# Supplementary material
Source: PubMed Central journal article supplement (PMC3433809)
Supplement: NIHMS361331-supplement-Supporting_Information.pdf [file NIHMS361331-supplement-Supporting_Information.pdf]

## Supplementary Materials

[bpinto@sfu.ca](mailto:bpinto@sfu.ca)

### **Contents:**

|                                                                                                                   |                     |
|-------------------------------------------------------------------------------------------------------------------|---------------------|
| <a href="#">Experimental procedures.....</a>                                                                      | <a href="#">S-1</a> |
| <a href="#">NMR data for 5-thioMan-(1-6)-<i>N</i>-Man (<b>3</b>).....</a>                                         | <a href="#">S-2</a> |
| <a href="#"><sup>1</sup>H-NMR spectrum for 5-thioMan-(1-6)-<i>N</i>-Man.....</a>                                  | <a href="#">S-3</a> |
| <a href="#"><sup>13</sup>C-NMR spectrum for 5-thioMan-(1-6)-<i>N</i>-Man.....</a>                                 | <a href="#">S-4</a> |
| <a href="#">CE analysis of <i>N</i>-glycans obtained from canstanospermine- or kifunensine-treated cells.....</a> | <a href="#">S-5</a> |
| <a href="#">Calibration curves for UDP-GlcNAc, UDP-Glc, GDP-Man and AMP quantification.....</a>                   | <a href="#">S-6</a> |
| <a href="#">Mass spectrometric analysis of 5-thiomannosides extracted from treated cells.....</a>                 | <a href="#">S-7</a> |

### **Experimental procedures**

#### *Extraction of 5-thiomannosides from treated cells*

Confluent monolayers of CHO K1 cells (*ca.*  $1 \times 10^7$  cells) were grown for 14 h in the presence or absence of 5-thioMan-(1,3)-*N*-Man. Cells were harvested into 2 mL methanol, sonicated in a water bath sonicator, and dried under a gentle stream of N<sub>2</sub>. Lipids were removed by sonicating samples in chloroform : methanol (2:1, 2x5mL) and the remaining pellets were extracted by sonicating the samples in 4 mL 18MΩ H<sub>2</sub>O. All samples were then passed through graphite-containing Hypersep SPE cartridges (Thermo Scientific). The flow through and aqueous washes (2x2mL), predicted to contain only monosaccharides,

were pooled. Disaccharides including the 5-thiomannosides were eluted with 5% CH<sub>3</sub>CN (2x2mL) while oligosaccharides were eluted using 50% CH<sub>3</sub>CN (2x2mL). All fractions were lyophilized. Non-retained material (*i.e.* the aqueous wash) were spiked with lactose and desalted using AG W50-X8(H<sup>+</sup>) and AG 1X4 (formate) ion exchange resins (1mL each). Samples were analyzed on an Agilent 6210 TOF LC/MS high resolution magnetic sector mass spectrometer using the electrospray ionization method. Of interest were ionic masses corresponding 5-thiomannoside hydrolysis or those in which the mass of the 5-thioMan-(1,3)-N-Man had increased by one or more hexose residue.

*NMR data for 5-thioMan-(1-6)-N-Man (3).*

**Methyl 6-amino-6-deoxy-6-*N*-(5-thio-β-D-mannopyranosyl)-α-D-mannopyranoside (major)**

<sup>1</sup>H NMR (D<sub>2</sub>O, 500 MHz): δ 4.66 (1H, d,  $J_{1,2} = 1.5$  Hz, H-1), 4.27 (1H, d,  $J_{1,2'} = 1.5$  Hz, H-1'), 4.12 (1H, dd,  $J_{2,3'} = 2.5$  Hz, H-2'), 3.89 (1H, dd,  $J_{6'a,6'b} = 12.0$ ,  $J_{6'a,5'} = 3.0$  Hz, H-6'a), 3.86-3.83 (1H, m, H-2), 3.76-3.57 (4H, m, H-6'b, H-4', H-3, H-5), 3.50-3.45 (1H, m, H-4), 3.38 (1H, dd,  $J_{3',4'} = 10.0$  Hz, H-3'), 3.33 (3H, s, -OCH<sub>3</sub>), 3.14 (1H, dd,  $J_{6a,6b} = 13.0$ ,  $J_{6a,5} = 3.0$  Hz, H-6a), 2.84 (1H, dt,  $J_{5',6'b} = J_{5',4'} = 7.0$  Hz, H-5'), 2.77 (1H, dd,  $J_{6b,5} = 8.0$  Hz, H-6b). <sup>13</sup>C NMR (D<sub>2</sub>O, 125 MHz): δ 100.8 (C-1), 75.0 (C-3'), 73.1 (C-2), 71.4 (C-5), 70.3 (C-3), 69.9 (C-4'), 69.8 (C-2'), 68.7 (C-4), 63.9 (C-1'), 60.8 (C-6'), 54.9 (-OCH<sub>3</sub>), 47.7 (C-6), 46.4 (C-5').

**Methyl 6-amino-6-deoxy-6-*N*-(5-thio-α-D-mannopyranosyl)-α-D-mannopyranoside (minor)**

<sup>1</sup>H NMR (D<sub>2</sub>O, 500 MHz): δ 4.67 (1H, d,  $J_{1,2} = 1.5$  Hz, H-1), 4.10 (1H, dd,  $J_{2,1'} = 3.5$ ,  $J_{2,3'} = 3.0$  Hz, H-2'), 3.92 (1H, d, H-1'), 3.86-3.83 (2H, m, H-6'a, H-2), 3.76-3.57 (4H, m, H-6'b, H-4', H-3, H-5), 3.55 (1H, dd,  $J_{3',4'} = 3.0$  Hz, H-3'), 3.50-3.45 (1H, m, H-4), 3.32 (3H, s, -OCH<sub>3</sub>), 3.01-2.95 (3H, m, H-6a, H-6b, H-5'). <sup>13</sup>C NMR (D<sub>2</sub>O, 125 MHz): δ 100.9 (C-1), 73.0 (C-2), 71.8 (C-3'), 70.3 (C-3), 69.83, 69.80, 69.7 (C-2', C-4', C-5), 68.8 (C-4), 65.4 (C-1'), 60.7 (C-6'), 54.9 (-OCH<sub>3</sub>), 47.3 (C-6), 43.6 (C-5').

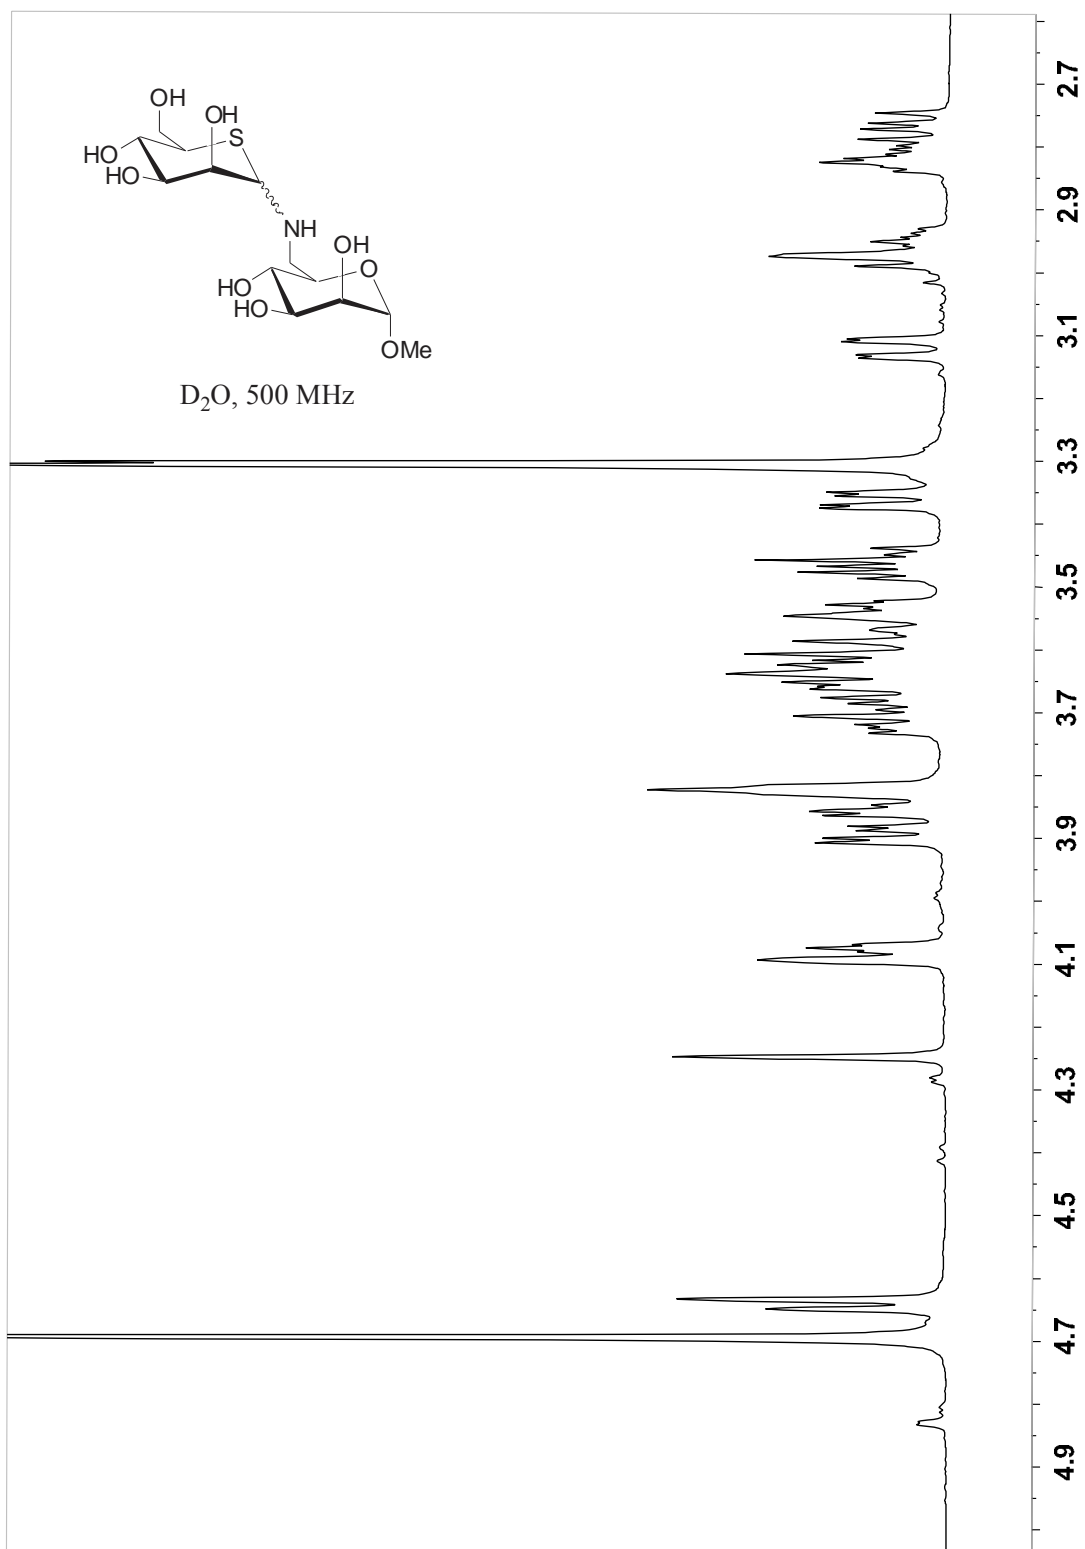

**Figure S-1.** <sup>1</sup>H-NMR spectrum for 5-thioMan-(1-6)-N-Man

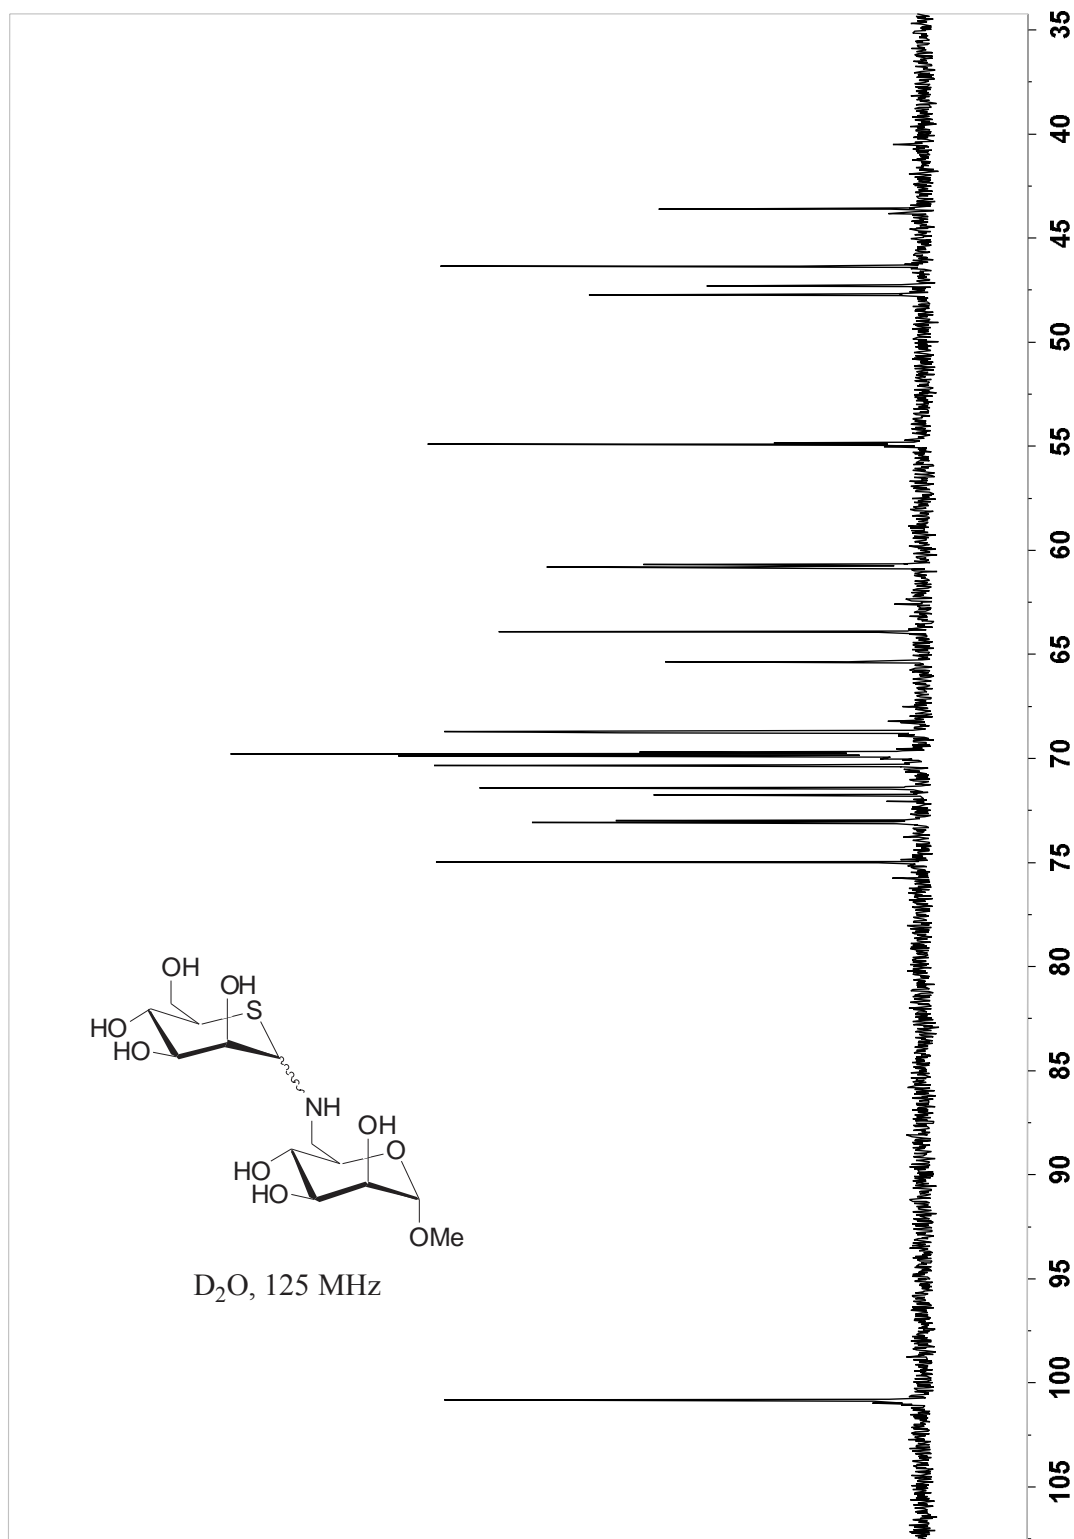

**Figure S-2.**  $^{13}\text{C}$ -NMR spectrum for 5-thioMan-(1-6)-*N*-Man.

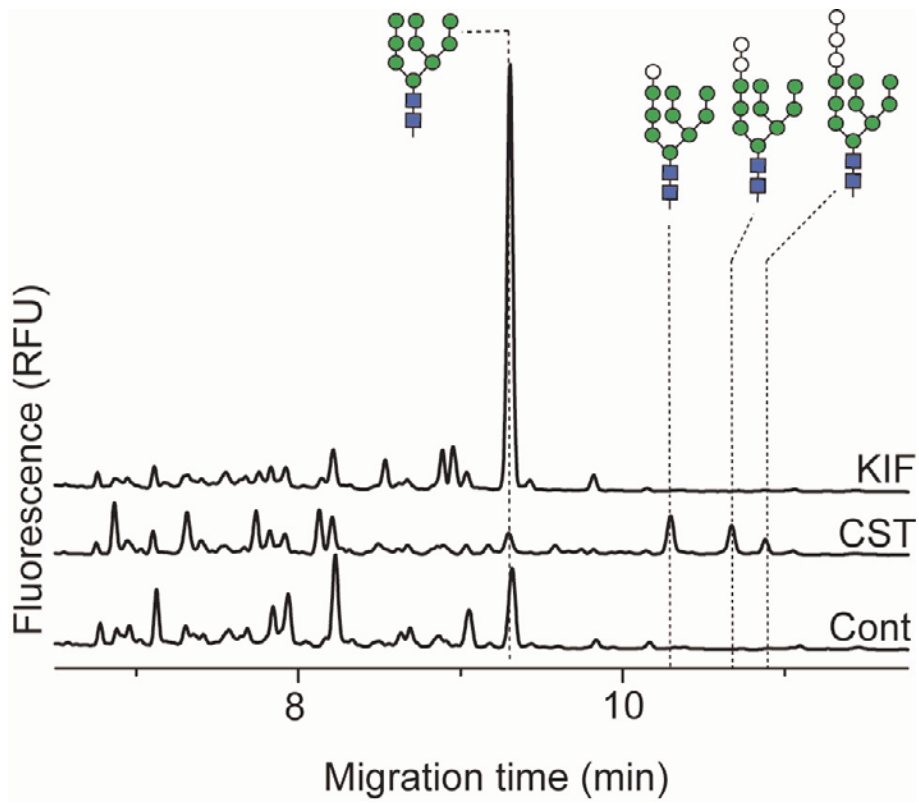

**Figure S-3.** [CE analysis of \*N\*-glycans obtained from canstanospermine \(CST\)- or kifunensine \(KIF\)-treated cells.](#)

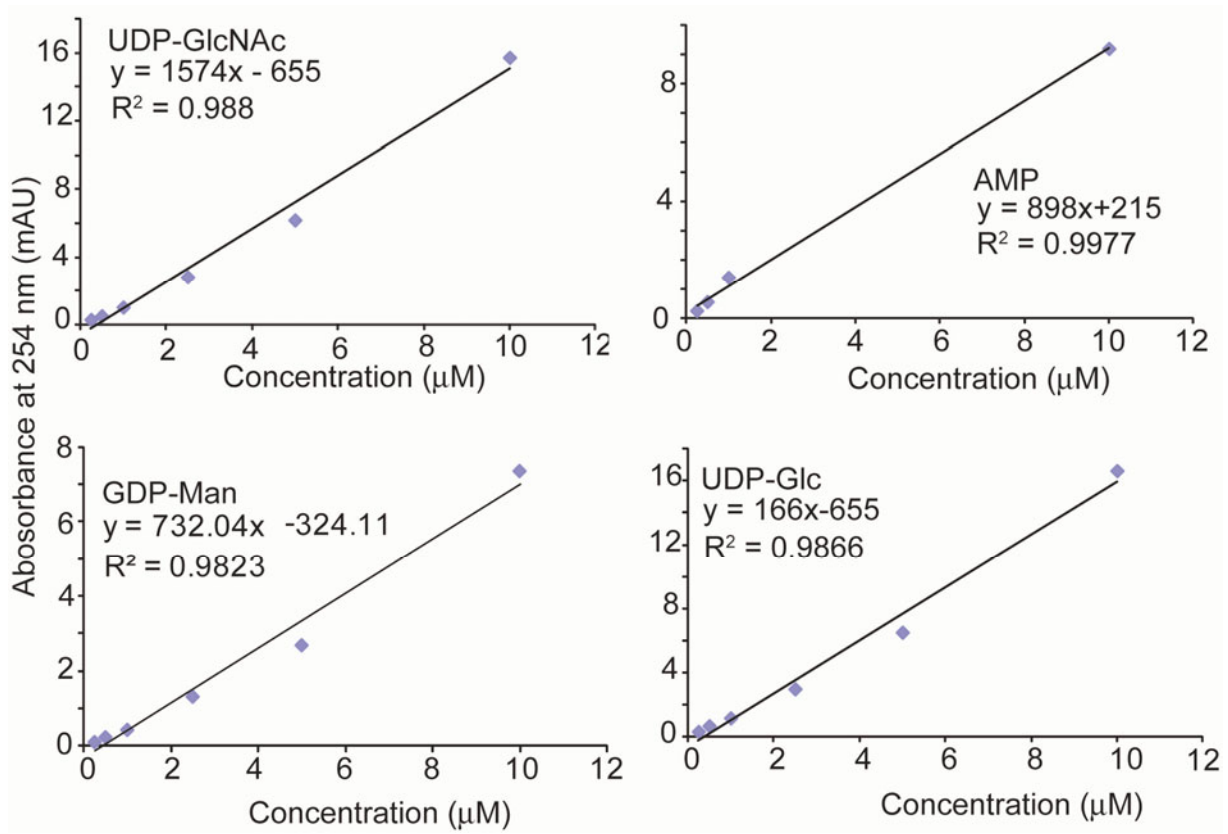

[Figure S-4. Calibration curves for UDP-GlcNAc, UDP-Glc, GDP-Man and AMP quantification.](#)

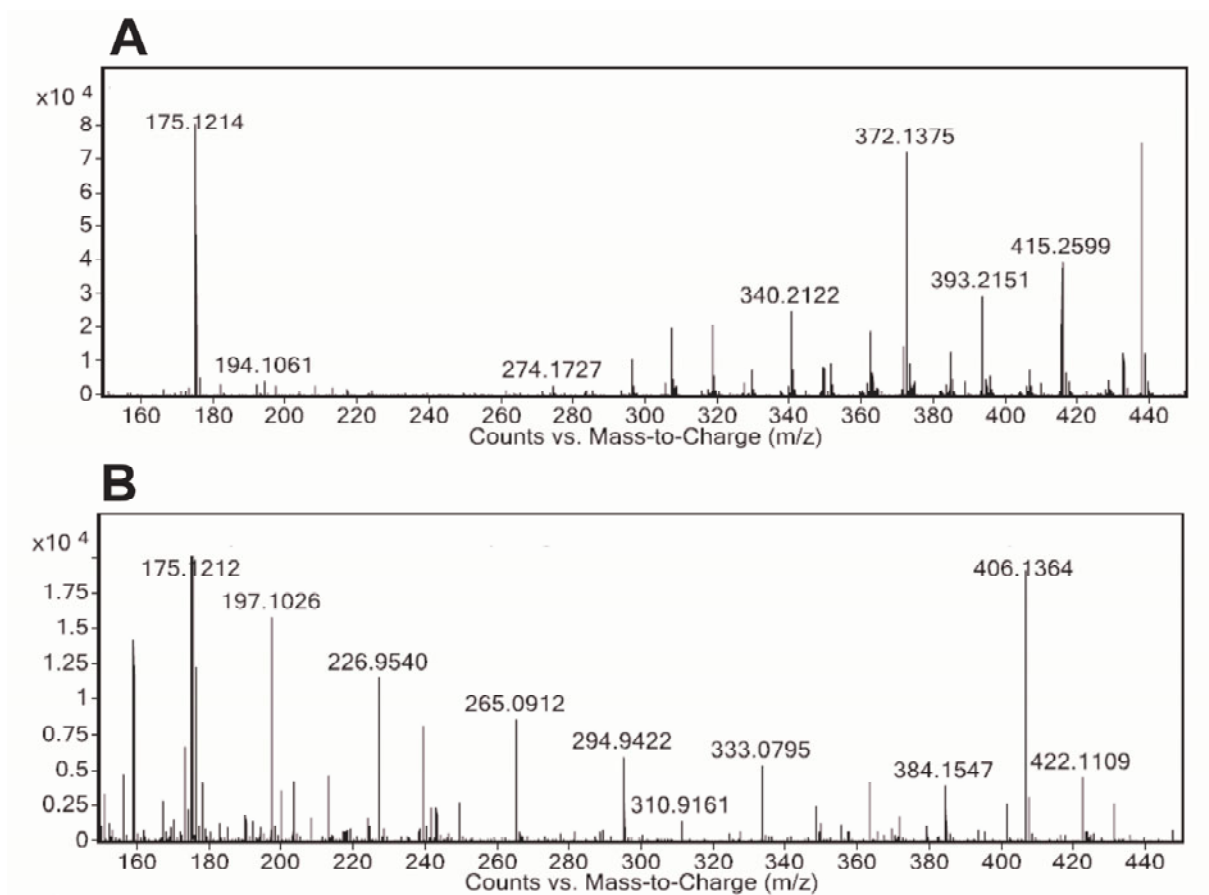

**Figure S-5.** Mass spectrometric analysis of 5-thiomannosides extracted from cells treated with (A) or without (B) 5-thioMan-(1-3)-N-Man (**3**). Compared are Hypersep SPE fractions (5% CH<sub>3</sub>CN) which had been confirmed to contain **3** but not monosaccharides such as 5-thiomannose or oligosaccharides.  $m/z$  ( $M+H^+$ ) for **3** is 372.13.
